# Supplementary material
Source: HighWire-hosted journal article supplement (http://ajnr-stage2.highwire.org/highwire/filestream/108470/field_highwire_adjunct_files/0/0234.pdf)

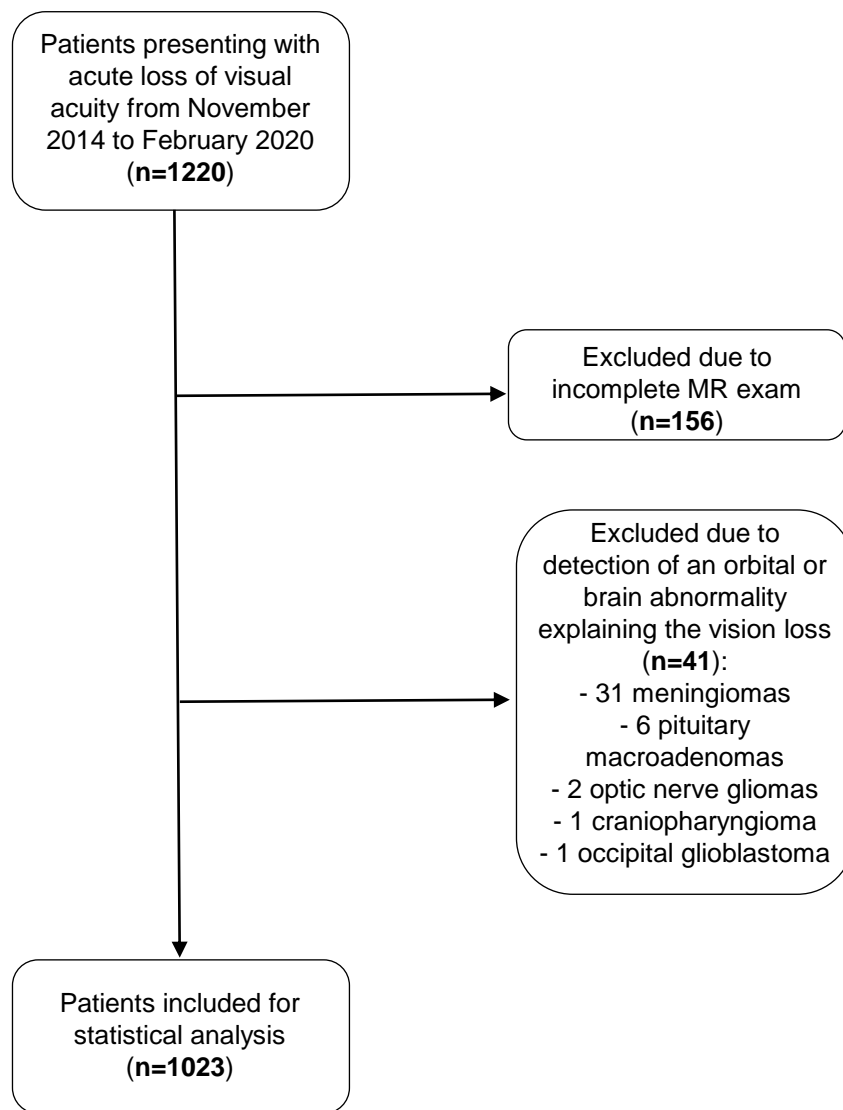

Supplement: 0234.pdf [file 0234.pdf]
